# Supplementary material for: Delayed severe cytokine storm and immune cell infiltration in SARS-CoV-2-infected aged Chinese rhesus macaques
Source: PubMed Central journal article supplement — Zool Res. 2020 Sep 18;41(5):503–16. doi: 10.24272/j.issn.2095-8137.2020.202 (PMC7475018; doi:10.24272/j.issn.2095-8137.2020.202), 2020-09-18
Supplement: zr-41-5-503-S1.pdf [file zr-41-5-503-S1.pdf]

## Panel: WBC subsets

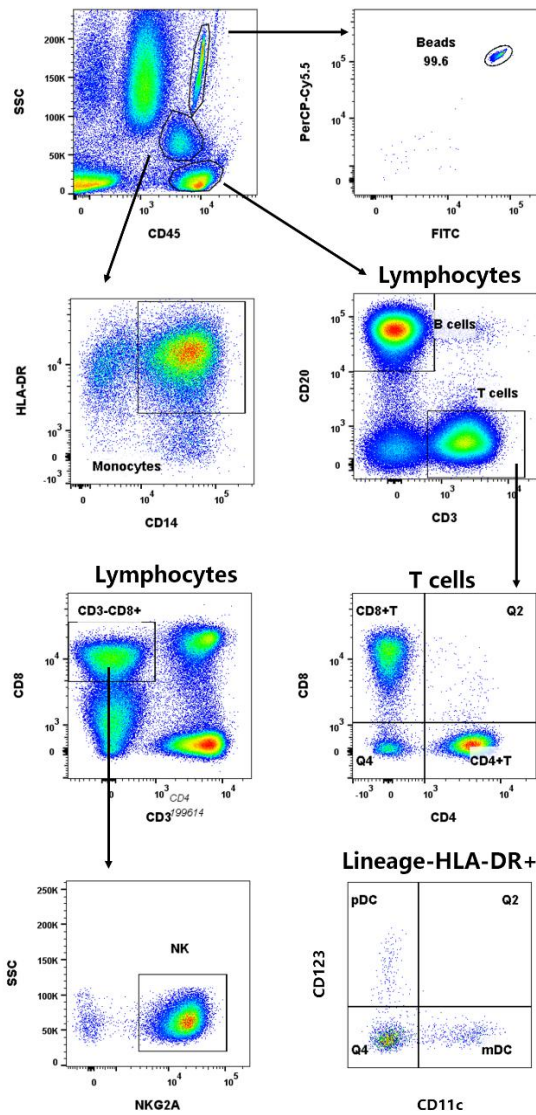

## Panel: T-cell activation

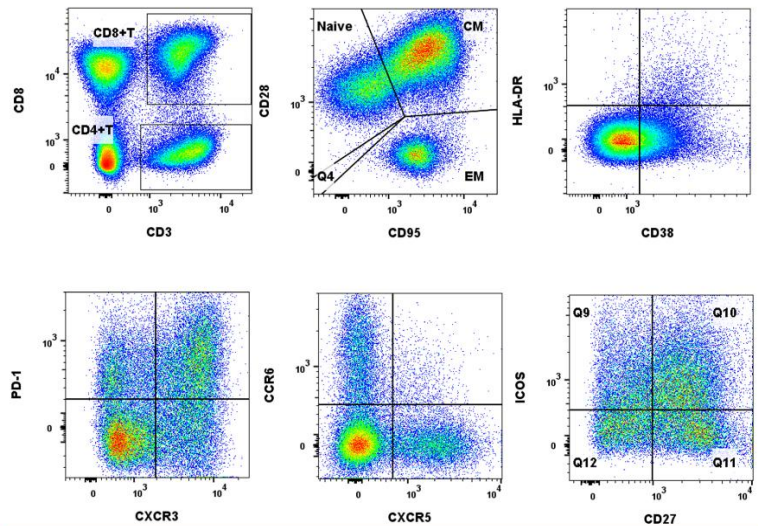

## Panel: T-cell regulation

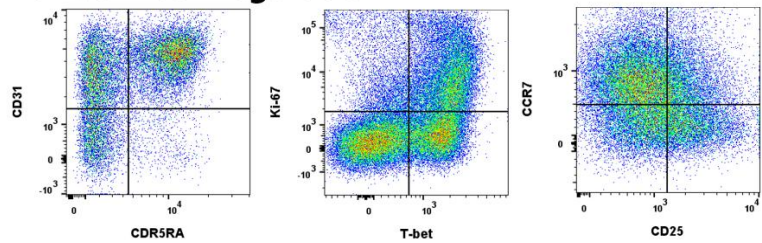

## Panel: T-cell function

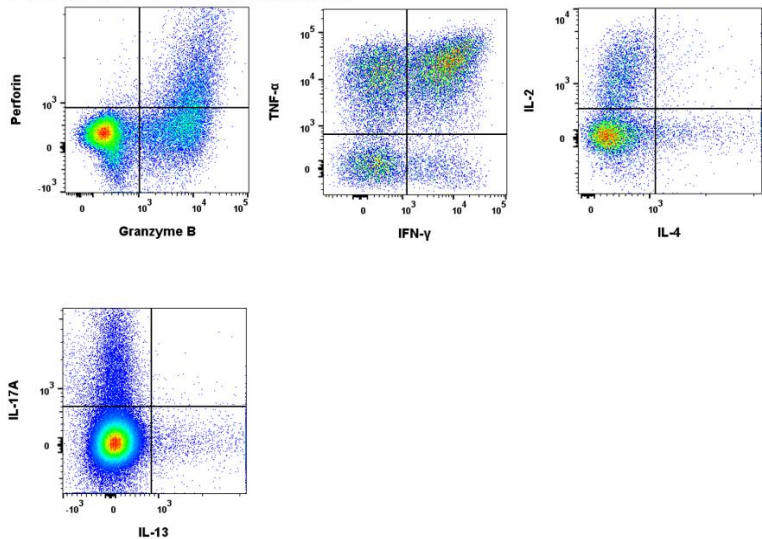

**Supplementary Figure S1. Gating strategies for flow cytometry analysis of rhesus macaque peripheral mononuclear cells.** First gated on CD45<sup>+</sup> hematopoietic cells, then separate them into lymphocytes by FSC and SSC, and monocytes by being CD14<sup>+</sup>HLA-DR<sup>+</sup>. Then lymphocytes were separated into B cells, T cells and NK cells as being CD3-CD20<sup>+</sup>, CD3+CD20<sup>-</sup>, CD3-CD8+NKG2A<sup>+</sup>, respectively. T cells were further divided into CD4+CD8<sup>-</sup> and CD4-CD8<sup>+</sup> subsets. CD123 and CD11c were used to divide CD3-CD20-CD14-HLA-DR<sup>+</sup> subset into pDC and mDC. Through different antibody panels and 12-color flow cytometry, the activation, regulation and functional characteristics of T cells were further analyzed. First, CD4<sup>+</sup> and CD8<sup>+</sup> T cells were divided into three differentiation stages including naïve (CD95<sup>dim</sup>CD28<sup>+</sup>), central memory (CD95<sup>high</sup>CD28<sup>+</sup>), and effector memory (CD95<sup>+</sup>CD28<sup>-</sup>) cells. The expression levels of CD27, CXCR3, PD-1, HLA-DR, CXCR5, ICOS, CCR6, CD38, CD25 were used to illustrate the changes of T cell chemotaxis and immune activation after viral infection. T-bet, CCR7, Ki67, CD31 and CD45RA were used as markers for T cell differentiation and function regulation. The soluble

mediators, such as Granzyme B, IL-4, IL-2, Perforin, IL-13, TNF- $\alpha$ , IL-17A and IFN- $\gamma$ , were used to describe antiviral function and immune response of T cells.

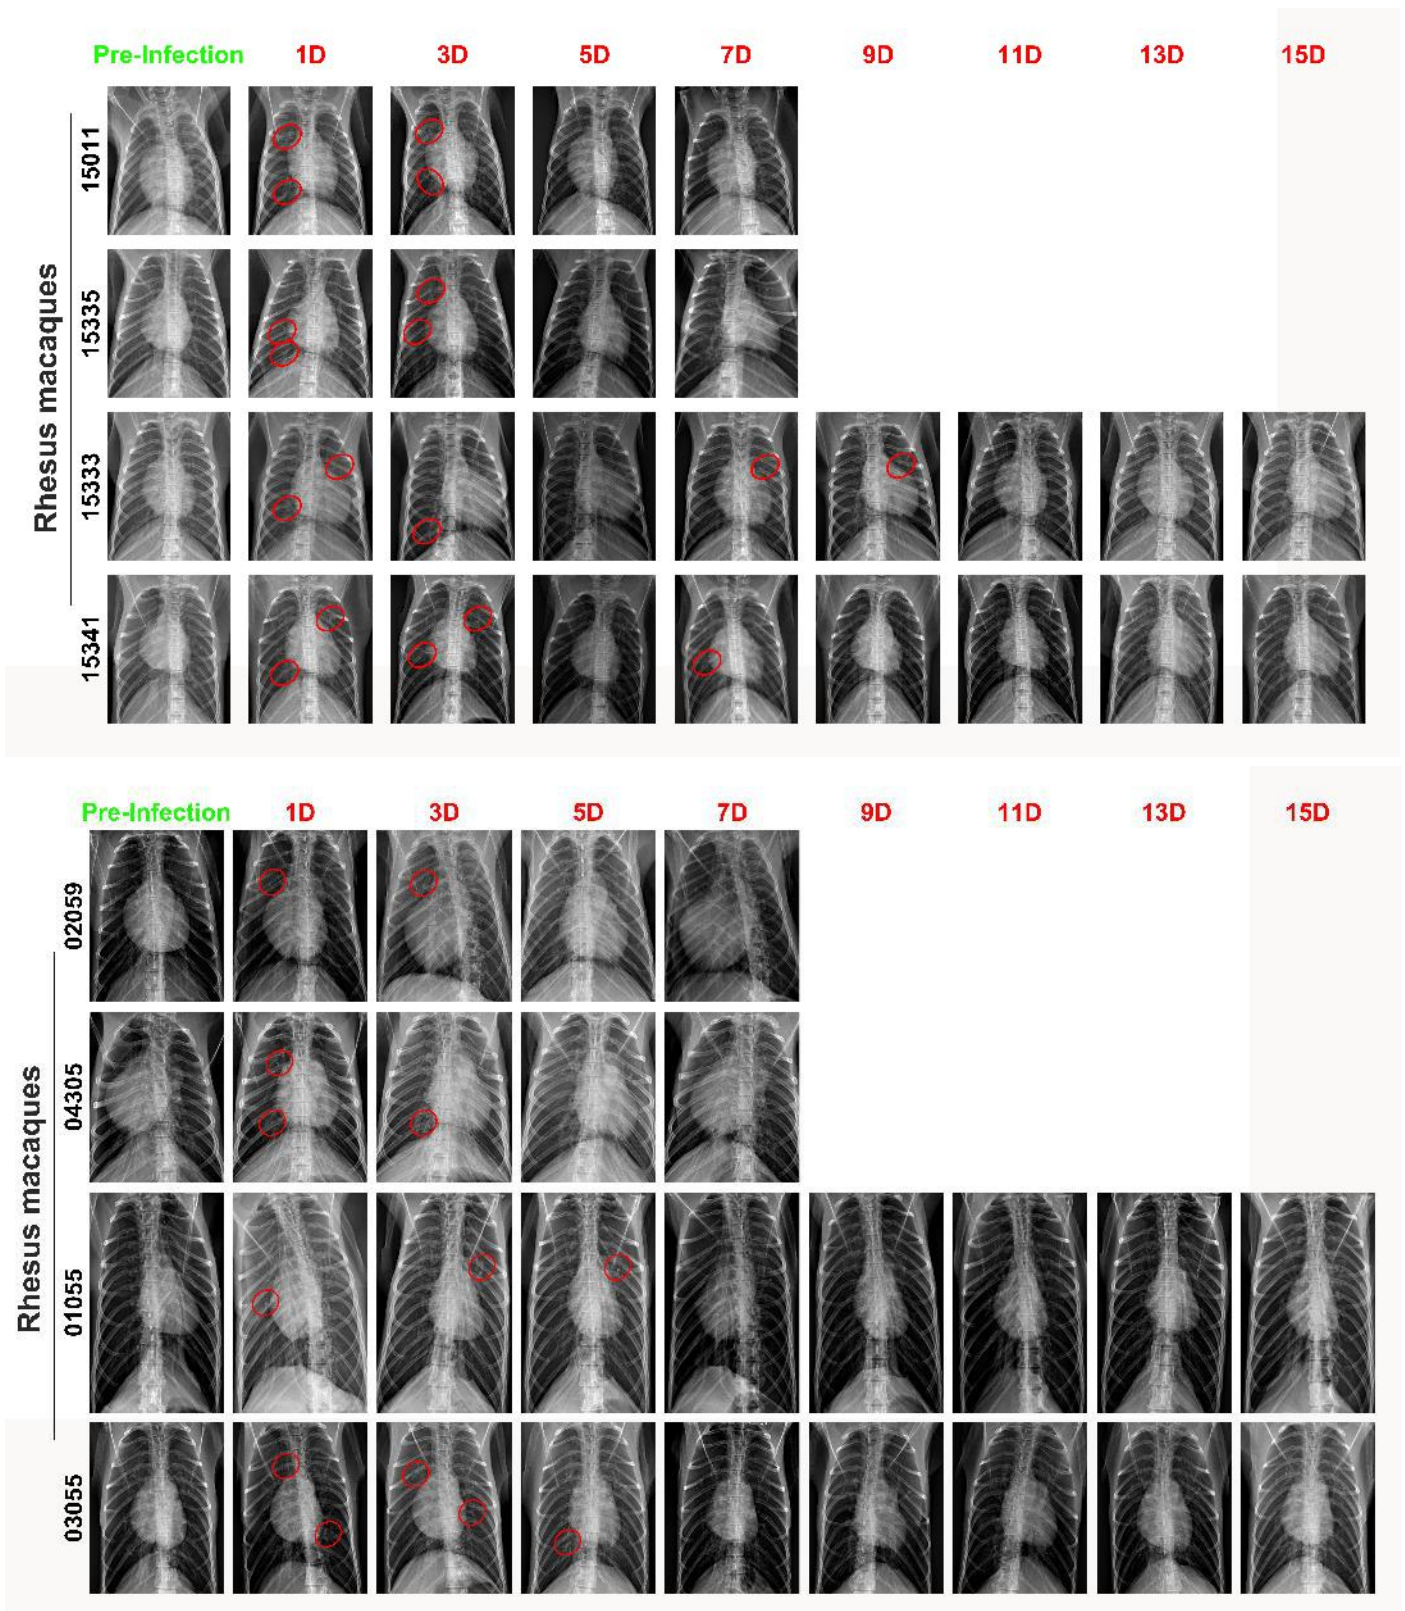

Supplementary Figure S2. Pulmonary infiltrates in rhesus macaques can be identified by mobile digital medical X-ray photography system.

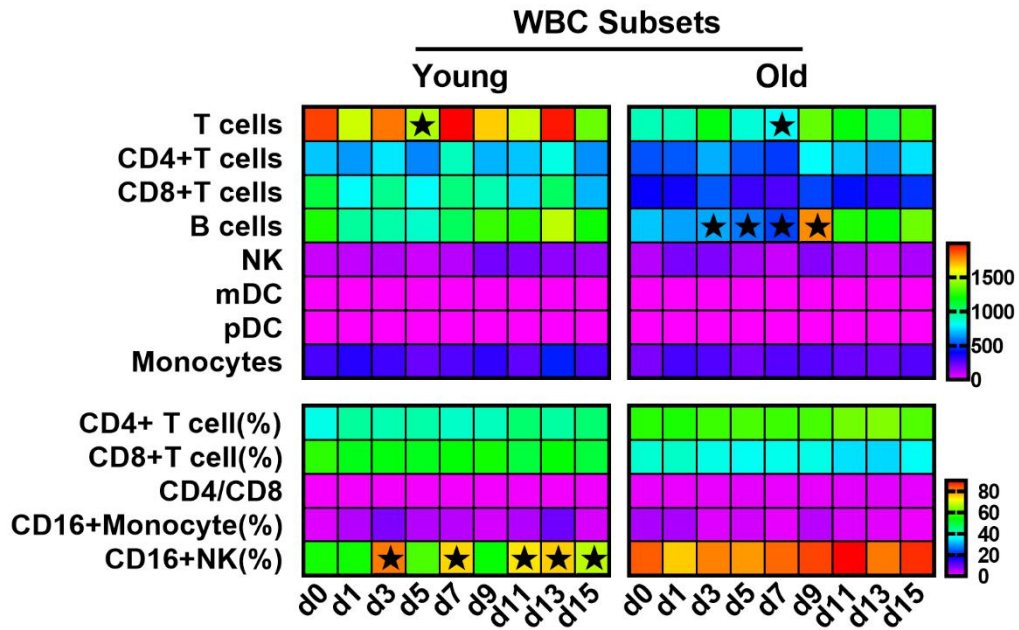

**Figure S3.** Heat map of changes in the number or proportion of the main leukocyte subsets in peripheral blood from young or old Chinese rhesus macaques after SARS-Cov-2 infection. The rainbow-colored squares represent the average cell number or frequency in each group. The black asterisk indicates  $p < 0.05$  compared to d0 by Fisher's LSD test post two-way ANOVA.

**Table S1 Antibodies for flow cytometry****Panel: WBC Subsets**

| <b>Antibody</b> | <b>Fluorochrome</b> | <b>Clone</b> | <b>Source</b>   |
|-----------------|---------------------|--------------|-----------------|
| CD123           | BV421               | 7G3          | BD Pharmigen    |
| CD20            | BV510               | 2H7          | BD Pharmigen    |
| CD45            | BV605               | D058-1283    | BD Pharmigen    |
| CD56            | BV650               | NCAM-16.2    | BD Pharmigen    |
| CD14            | BV786               | M5E2         | BD Pharmigen    |
| CD11C           | FITC                | 3.9          | BD Pharmigen    |
| NKG2A           | PE                  | REA110       | Miltenyi Biotec |
| CD16            | PE-CF594            | 3G8          | BD Pharmigen    |
| CD4             | PerCP-Cy5.5         | L200         | BD Pharmigen    |
| HLA-DR          | APC                 | G46-6        | BD Pharmigen    |
| CD8             | APC-R700            | RPA-T8       | BD Pharmigen    |
| CD3             | APC-Cy7             | SP34-2       | BD Pharmigen    |

**Panel: T-cell Activation**

| <b>Antibody</b> | <b>Fluorochrome</b> | <b>Clone</b> | <b>Source</b> |
|-----------------|---------------------|--------------|---------------|
| CD27            | BV421               | MT271        | BD Pharmigen  |
| CD28            | BV510               | CD28.2       | BD Pharmigen  |
| CXCR3           | BV605               | G025H7       | Biolegend     |
| PD-1            | BV650               | EH12.2H7     | Biolegend     |
| CD95            | BV786               | DX2          | Biolegend     |
| HLA-DR          | FITC                | G46-6        | BD Pharmigen  |
| CXCR5           | PE                  | MU5UBEE      | eBioscience   |
| ICOS            | PE-Dazzle594        | C398.4A      | Biolegend     |
| CCR6            | PerCP-Cy5.5         | G034E3       | Biolegend     |
| CD38            | APC                 | AT-1         | NIH           |
| CD8             | APC-R700            | RPA-T8       | Biolegend     |
| CD3             | APC-Cy7             | SP34-2       | Biolegend     |

**Panel: T-cell Regulation**

| <b>Antibody</b> | <b>Fluorochrome</b> | <b>Clone</b> | <b>Source</b> |
|-----------------|---------------------|--------------|---------------|
|-----------------|---------------------|--------------|---------------|

|                       |              |           |              |
|-----------------------|--------------|-----------|--------------|
| CD25                  | BV421        | M-A251    | BD Pharmigen |
| CD28                  | BV510        | CD28.2    | BD Pharmigen |
| T-bet                 | BV605        | 4B10      | Biolegend    |
| CCR7                  | BV650        | 3D12      | Biolegend    |
| CD95                  | BV786        | DX2       | Biolegend    |
| p-STAT1(Tyr701))      | Purified     | 5D86      | CST          |
| Ki67                  | PE           | B56       | BD Pharmigen |
| CD31                  | PE-Dazzle594 | WM59      | Biolegend    |
| Foxp3                 | PE-Cy5       | PCH101    | eBioscience  |
| CD45RA                | APC          | 5H9       | BD Pharmigen |
| CD8                   | APC-R700     | RPA-T8    | BD Pharmigen |
| CD3                   | APC-Cy7      | SP34-2    | BD Pharmigen |
| Mouse anti rabbit IgG | FITC         | Polyclone | Boster       |

**Panel: T-cell Function**

| <b>Antibody</b> | <b>Fluorochrome</b> | <b>Clone</b> | <b>Source</b>   |
|-----------------|---------------------|--------------|-----------------|
| Granzyme B      | Pacific Blue        | GB11         | Biolegend       |
| CD28            | BV510               | CD28.2       | BD Pharmigen    |
| IL-4            | BV604               | MP4-25D2     | Biolegend       |
| IL-2            | BV650               | MQ1-17H12    | Biolegend       |
| CD95            | BV786               | DX2          | Biolegend       |
| Perforin        | FITC                | Pf-344       | Mabtech         |
| IL-13           | PE                  | JES10-5A2.2  | Miltenyi Biotec |
| TNF- $\alpha$   | PE-Dazzle594        | MAb11        | Biolegend       |
| IL-17A          | PerCP-Cy5.5         | BL168        | Biolegend       |
| IFN- $\gamma$   | APC                 | 4S.B3        | Biolegend       |
| CD8             | APC-R700            | RPA-T8       | BD Pharmigen    |
| CD3             | APC-Cy7             | SP34-2       | BD Pharmigen    |
